# Supplementary material
Source: PubMed Central journal article supplement (PMC6645486)
Supplement: ao8b01187_si_001.pdf [file ao8b01187_si_001.pdf]

**Biophysical correlates on the composition, functionality and structure of dendrimer-liposome aggregates**

Biplab Roy,<sup>1</sup> Pritam Guha,<sup>1</sup> Prasant Nahak,<sup>1</sup> Gourab Karmakar,<sup>1</sup> Souvik Maiti,<sup>2</sup> Amit Kumar Mandal,<sup>3</sup> Alexey G. Bykov,<sup>4</sup> Alexander V. Akentiev,<sup>4</sup> Boris A. Noskov,<sup>4</sup> Koji Tsuchiya,<sup>5</sup> Kanjiro Torigoe,<sup>5</sup> Amiya Kumar Panda<sup>6\*</sup>

<sup>1</sup>Department of Chemistry, University of North Bengal, Darjeeling – 734 013, West Bengal, India. Email: BR: biplabnbu1988@gmail.com; PG: pritam66688@gmail.com; P.N. : prasant.nahak@gmail.com; GK: karmakargourab15@gmail.com

<sup>2</sup>Proteomics and Structural Biology Unit, CSIR-Institute of Genomics and Integrative Biology, Mall Road, Delhi 110 007, India. Email: Souvik@igib.res.in

<sup>3</sup>Chemical Biology Laboratory, Department of Sericulture, Raiganj University, Uttar Dinajpur-733134, West Bengal, India. Email: amitmandal08@gmail.com

<sup>4</sup>Department of Colloid Chemistry, St. Petersburg State University, Universitetsky pr. 26, 198504 St. Petersburg, Russia. Email: A. G. B.: ag-bikov@mail.ru; A.V. A: superkeha@yandex.ru; B.A. N: borisanno@rambler.ru

<sup>5</sup>Department of Pure and Applied Chemistry, Tokyo University of Science, 2641 Yamazaki, Noda, Tokyo 278-8510, Japan. Email: K. T.: kjtsuchi@rs.noda.tus.ac.jp; K. T. : ktorigoe@rs.noda.tus.ac.jp

<sup>6</sup>Department of Chemistry and Chemical Technology, Vidyasagar University, Midnapore – 721102, West Bengal, India. Email: akpanda@mail.vidyasagar.ac.in

**Author for Correspondence:**

Prof. Amiya Kumar Panda  
Department of Chemistry and Chemical Technology  
Vidyasagar University  
Midnapore – 721 102, West Bengal; INDIA  
Email: akpanda@mail.vidyasagar.ac.in  
Phone: +919433347210  
Fax: +91322275329/297

Supplementary Section

Table S1. Binding constant ( $K$ ) for the formation of dendrimer-liposome complex.

| Dendrimer generation→ | $10^{-4} \times K / \text{mol}^{-1}$ |      |      |
|-----------------------|--------------------------------------|------|------|
|                       | 3G                                   | 4G   | 5G   |
| Liposomes↓            |                                      |      |      |
| DHP+DPPC              | 8.81                                 | 6.71 | 5.21 |
| DMPG+DPPC             | 10.74                                | 9.72 | 7.21 |
| DPP+DPPC              | 10.06                                | 7.82 | 6.32 |
| DPPEth+DPPC           | 9.98                                 | 7.81 | 6.11 |

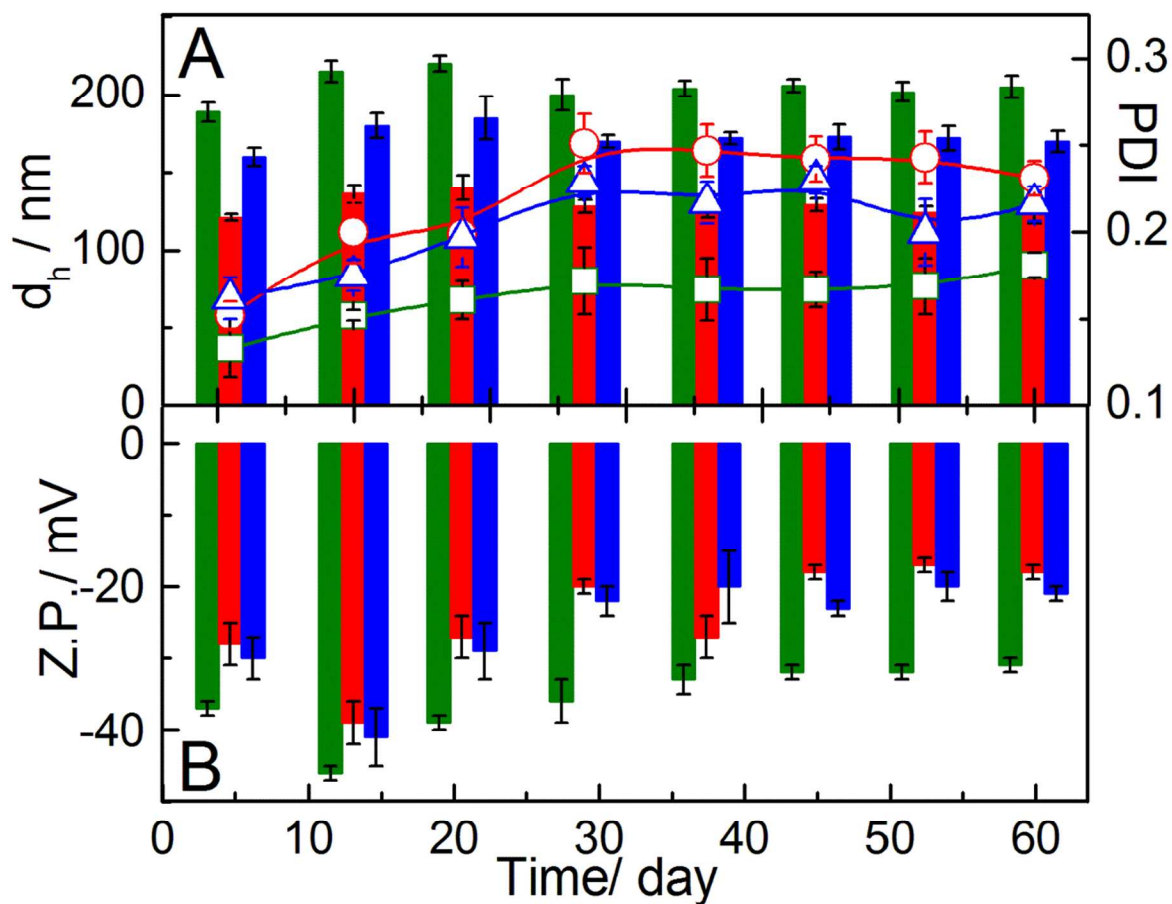

Figure S1. Variation in the hydrodynamic diameter ( $d_h$ ), polydispersity index (PDI, line graphs) and zeta potential (ZP) of different liposomes with time. 30 mol % cholesterol was used in each case. DPPC : anionic lipid ratio is 7:3 (M/M). Bar/lines: green, DHP+DPPC; red, DMPG+DPPC and blue, DPP+DPPC. Temperature: 25 °C. Phospholipid concentration: 0.1 mM..

Supplementary Section

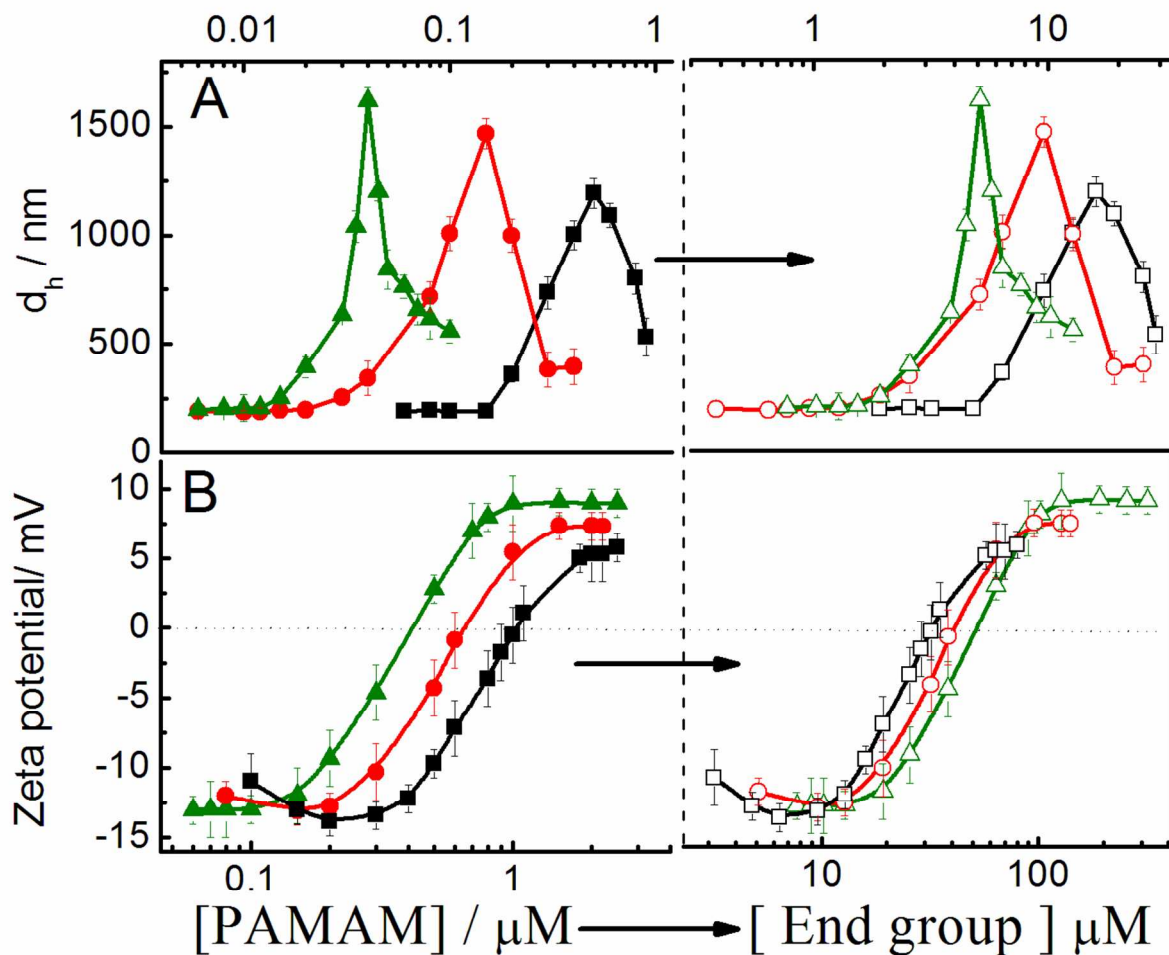

Figure S2. Effect of dendrimer generation and concentration : (G3,  $\blacksquare$ ; G4,  $\bullet$  and G5,  $\blacktriangle$ ) on the size (A) and zeta potential (B) of the (DPPC+DHP) liposome solutions (Left). Right side indicates the effect of end group concentration instead of concentration of dendrimer ( $\square$ , 3G;  $\circ$ , 4G and  $\triangle$ , 5G). 30 mol % cholesterol was used in each case. Phospholipid concentration : 0.1 mM.

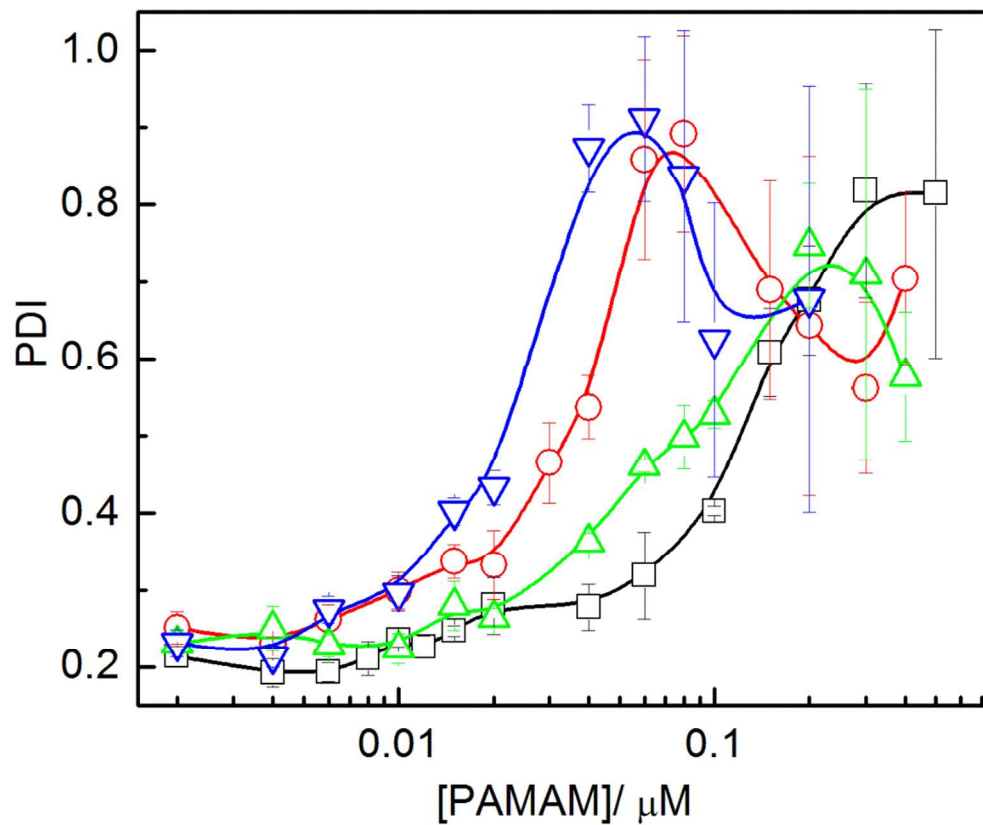

Figure S3. Polydispersity index (PDI) of different liposomes with varying concentration of 4G PAMAM dendrimer. Liposomes:  $\square$ , DHP+DPPC;  $\circ$ , DMPG+DPPC;  $\Delta$ , DPP+DPPC and  $\nabla$ , DPPEth+DPPC. 30 mol % cholesterol was used in each case. Phospholipid concentration: 0.1 mM.

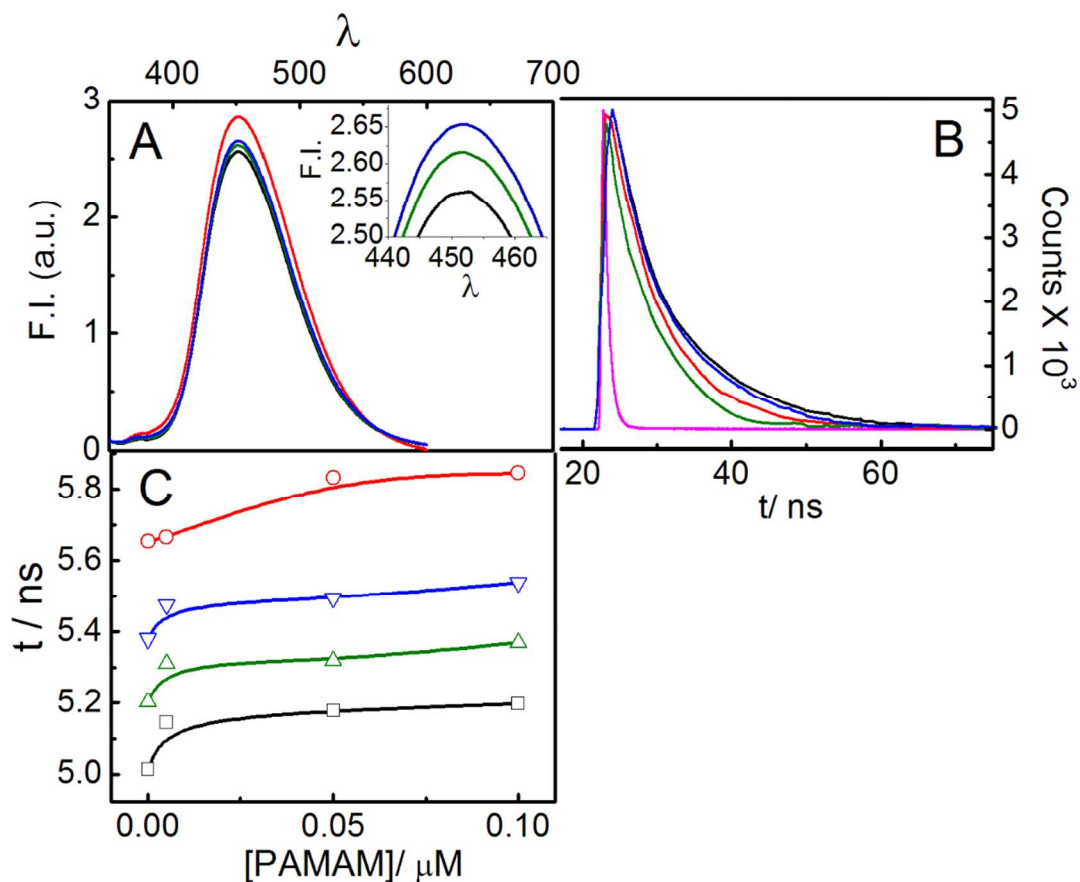

Figure S4. Steady state fluorescence spectra and life time study using 7-HC as a probe: panel A, steady state spectra of different liposomes ( black, DHP+DPPC; red, DMPG+DPPC; green, DPP+DPPC and blue, DPPEth+DPPC); panel B, fluorescence intensity decay for different liposomes (black, DHP+DPPC; red, DMPG+DPPC; green, DPP+DPPC, blue, DPPEth+DPPC and pink, IRF, instrument response function) and panel C, fluorescence life time for different liposomes ( $\square$ , DHP+DPPC;  $\circ$ , DMPG+DPPC;  $\triangle$ , DPP+DPPC and Panel D, DPPEth+DPPC) with varying concentration of dendrimer. 30 mol % cholesterol was used in each case. Phospholipid concentration: 0.1 mM.

Supplementary Section

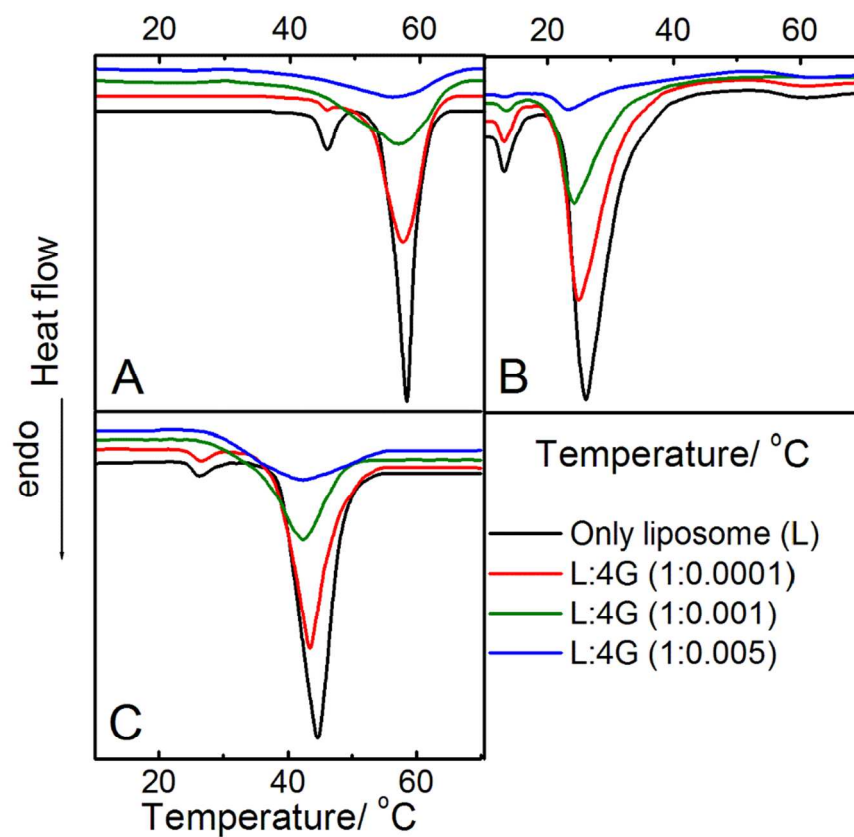

Figure S5. DSC thermogram of liposomes (panel A, DHP+DPPC; panel B, DMPG+DPPC and panel C, DPP+DPPC liposome) in presence and absence of PAMAM dendrimer of generation 4. 30 mol % cholesterol was used in each case.

Supplementary Section

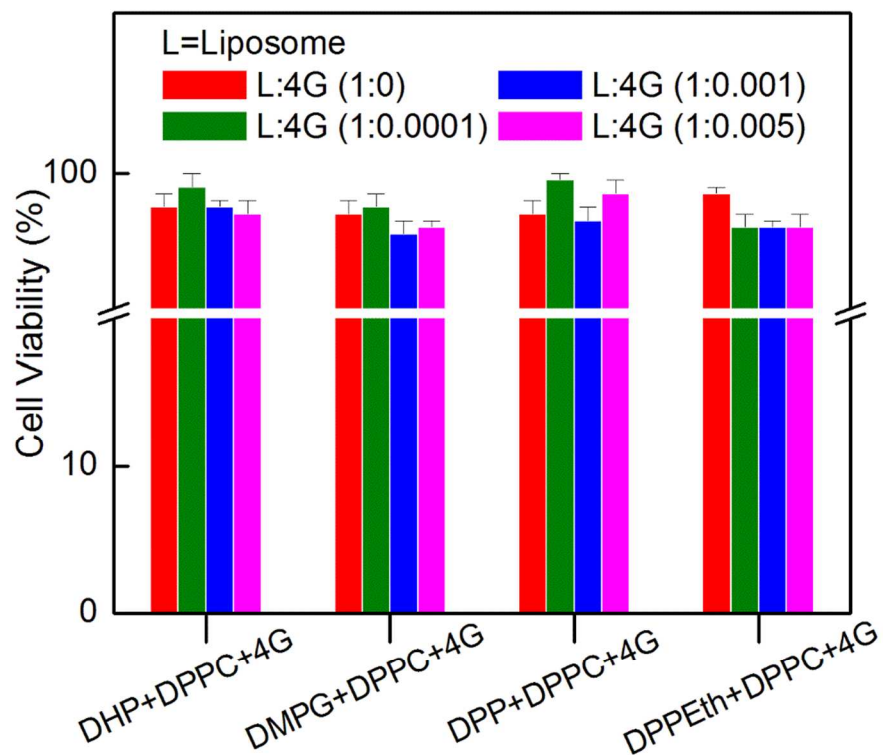

Figure S6. Dose response on various liposomes and dendrimer-liposome complexes with variation of 4G PAMAM dendrimer concentration on human blood cell lymphocyte. 30 mol % cholesterol was used in each case. Phospholipid concentration: 0.1 mM.



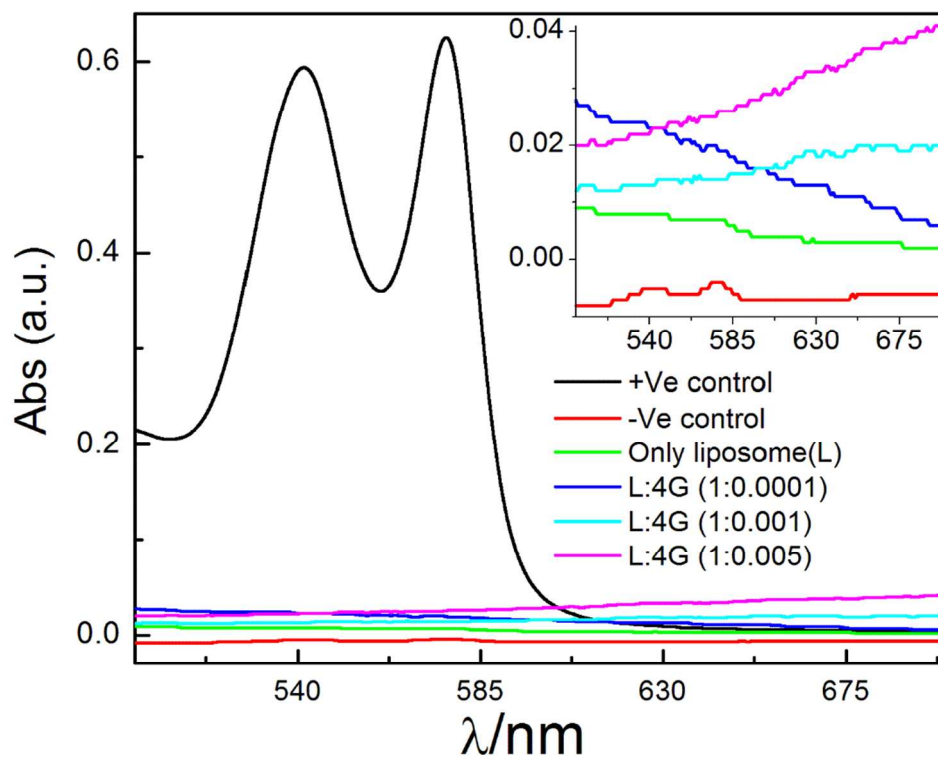

Figure S7. Haemolysis study of DPPeEth+DPPC liposome and dendrimer-liposome aggregates. 30 mol % cholesterol was used in each case. Phospholipid concentration: 0.1 mM.
